# Supplementary material for: Electrochromic thin films of tungsten oxide with high-exposure (002) crystal faces doped and modulated with cerium acetate
Source: Royal Society of Chemistry journal article supplement (doi:10.1039/d4nr05095a), 2025-01-01
Supplement: d4nr05095a1.pdf [file d4nr05095a1.pdf]

**Supplemental Information:**

Fig. S1 TEM image and corresponding EDS elemental mapping image of  $\text{WO}_3$ .

Fig. S2 TEM image of  $\text{WO}_3$ -HAC with HRTEM image of the corresponding dashed box regions.

Fig. S3 EDS of W, O and C in (a)  $\text{WO}_3$  films and (b)  $\text{WO}_3$ -HAC films.

Fig. S4 PDOS patterns of O 2p and W 5d orbitals for  $\text{WO}_3$ -HAC.

Fig. S5 I-T curves of  $\text{WO}_3$ ,  $\text{WO}_3$ -HAC and  $\text{WO}_3$ -CA films.

Fig. S6 CV curves for (a)  $\text{WO}_3$ , (b)  $\text{WO}_3$ -HAC and (c)  $\text{WO}_3$ -CA in the region of  $\text{OCP} \pm 50$  mV (V vs. Ag/AgCl) with various scan rates. CV curves for (d)  $\text{WO}_3$ , (e)  $\text{WO}_3$ -HAC and (f)  $\text{WO}_3$ -CA with various scan rates.

Tab. S1 EDS elemental mapping of O, W, C and Ce in  $\text{WO}_3$ ,  $\text{WO}_3$ -HAC and  $\text{WO}_3$ -CA films.

Tab. S2 Percentage XPS atoms of W, C, Ce and O in  $\text{WO}_3$ ,  $\text{WO}_3$ -HAC and  $\text{WO}_3$ -CA films.

Tab. S3 Impedance fitting circuit diagrams for  $\text{WO}_3$ ,  $\text{WO}_3$ -HAC, and  $\text{WO}_3$ -CA samples.

Tab. S4 Comparison of transmittance change, coloring time, and bleaching time for various  $\text{WO}_3$ -based electrochromic materials.

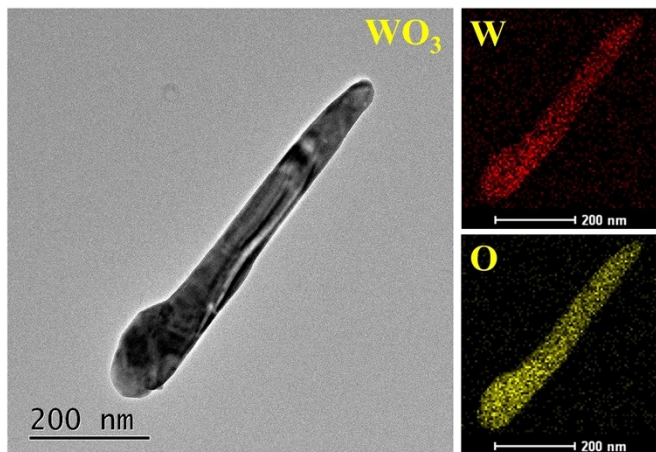

**Fig. S1** TEM image and corresponding EDS elemental mapping image of  $\text{WO}_3$ .

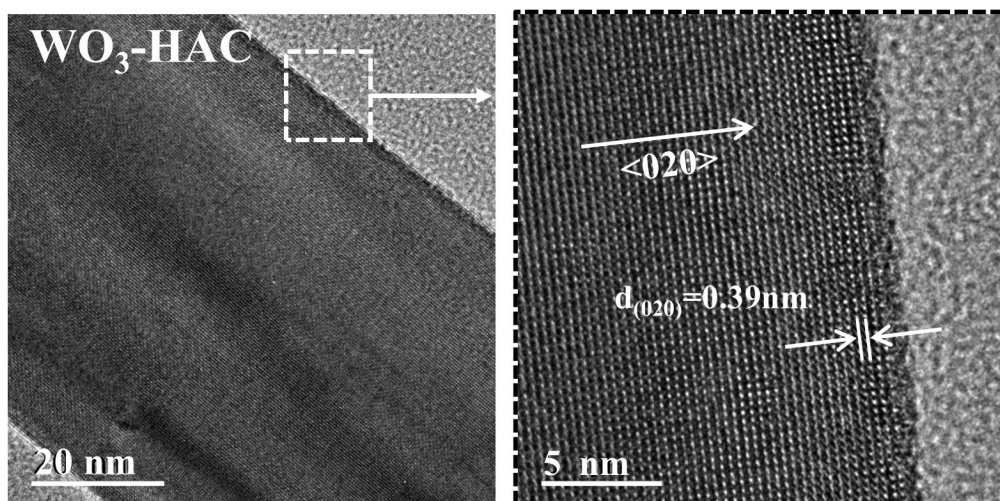

**Fig. S2** TEM image of  $\text{WO}_3\text{-HAC}$  with HRTEM image of the corresponding dashed box regions.

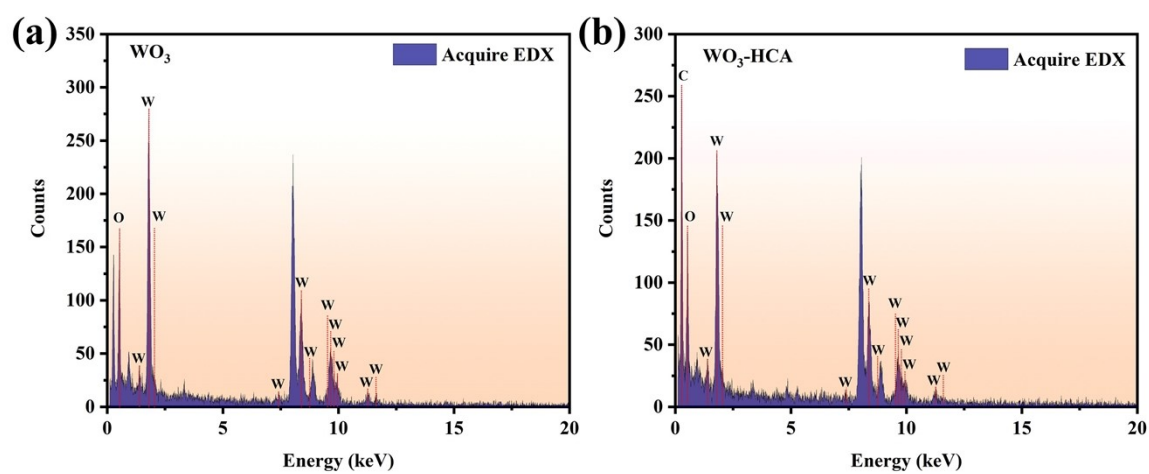

**Fig. S3** EDS of W, O and C in (a)  $\text{WO}_3$  films and (b)  $\text{WO}_3\text{-HAC}$  films.

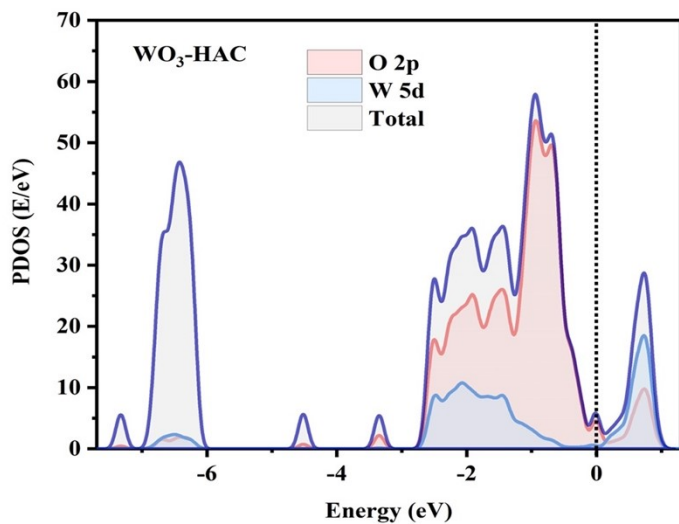

Fig. S4 PDOS patterns of O 2p and W 5d orbitals for WO<sub>3</sub>-HAC.

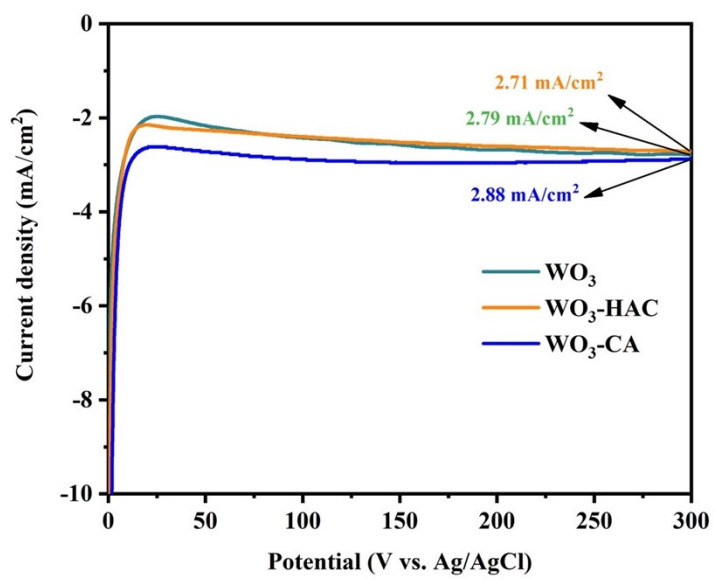

Fig. S5 I-T curves of WO<sub>3</sub>, WO<sub>3</sub>-HAC and WO<sub>3</sub>-CA films.

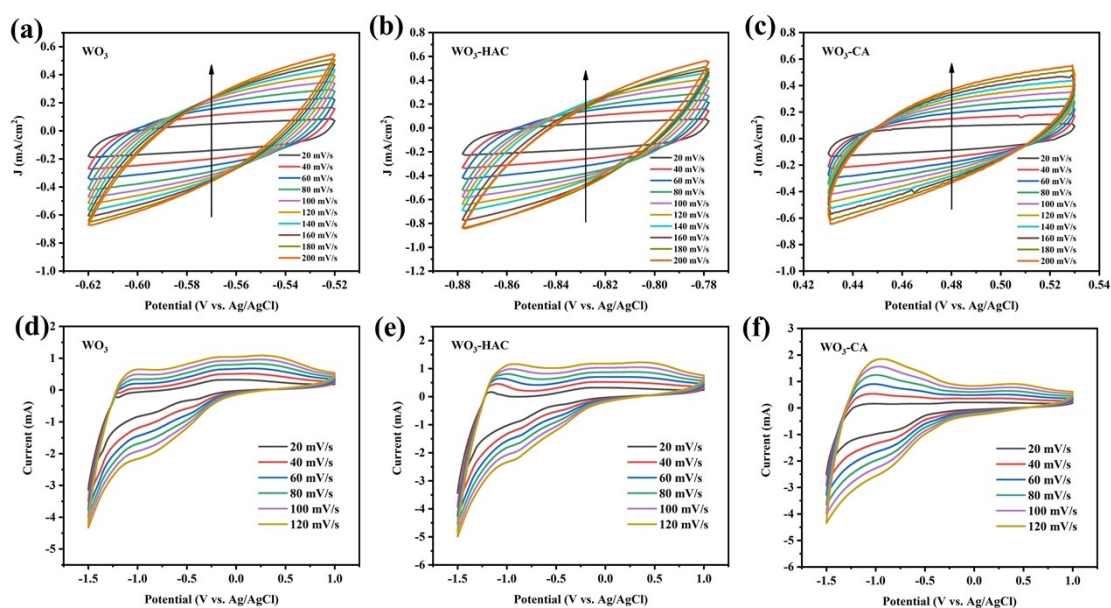

**Fig. S6** CV curves for (a)  $\text{WO}_3$ , (b)  $\text{WO}_3\text{-HAC}$  and (c)  $\text{WO}_3\text{-CA}$  in the region of  $\text{OCP} \pm 50$  mV (V vs. Ag/AgCl) with various scan rates. CV curves for (d)  $\text{WO}_3$ , (e)  $\text{WO}_3\text{-HAC}$  and (f)  $\text{WO}_3\text{-CA}$  with various scan rates.

**Tab. S1** EDS elemental mapping of O, W, C and Ce in  $\text{WO}_3$ ,  $\text{WO}_3\text{-HAC}$  and  $\text{WO}_3\text{-CA}$  films.

| Element | $\text{WO}_3$ | $\text{WO}_3\text{-HAC}$ | $\text{WO}_3\text{-CA}$ |
|---------|---------------|--------------------------|-------------------------|
| O(K)    | 78.82         | 17.45                    | 13.57                   |
| W(L)    | 21.18         | 4.45                     | 6.15                    |
| C(K)    | -             | 78.10                    | 80.07                   |
| Ce(K)   | -             | -                        | 0.21                    |
| Total   | 100.00        | 100.00                   | 100.00                  |

**Tab. S2** Percentage XPS atoms of W, C, Ce and O in  $\text{WO}_3$ ,  $\text{WO}_3\text{-HAC}$  and  $\text{WO}_3\text{-CA}$  films.

| Name  | $\text{WO}_3$ | $\text{WO}_3\text{-HAC}$ | $\text{WO}_3\text{-CA}$ |
|-------|---------------|--------------------------|-------------------------|
| W 4f  | 14.97         | 14.83                    | 10.14                   |
| C 1s  | 15.9          | 35.53                    | 40.95                   |
| Ce 3p | -             | -                        | 0.5                     |
| O 1s  | 69.13         | 49.64                    | 48.41                   |

**Tab. S3** Impedance fitting circuit diagrams for  $\text{WO}_3$ ,  $\text{WO}_3\text{-HAC}$ , and  $\text{WO}_3\text{-CA}$

samples.

| Samples              | $R_1$ | $R_2$ | $W_1R$ | $W_1T$ | $W_1P$ | $CPE_{1T}$ | $CPE_{1P}$ |
|----------------------|-------|-------|--------|--------|--------|------------|------------|
| WO <sub>3</sub> -CA  | 9.33  | 33.21 | 431.1  | 0.425  | 0.758  | 0.469      | 0.742      |
| WO <sub>3</sub> -HAC | 38.72 | 52.33 | 711.3  | 0.722  | 0.739  | 1.352      | 0.793      |
| WO <sub>3</sub>      | 61.38 | 52.45 | 864.7  | 0.755  | 0.747  | 0.528      | 0.833      |

**Tab. S4** Comparison of transmittance change, coloring time, and bleaching time for various WO<sub>3</sub>-based electrochromic materials.

| Sample                                         | Transmittance Difference (%) | Coloring Time (s) | Bleaching Time (s) | Reference |
|------------------------------------------------|------------------------------|-------------------|--------------------|-----------|
| WO <sub>3</sub>                                | 31.6 (600 nm)                | 3.1               | 3.1                | This Work |
| WO <sub>3</sub> -HAC                           | 34.5 (600 nm)                | 2.6               | 2.6                | This Work |
| WO <sub>3</sub> -CA                            | 52.0 (600 nm)                | 2.1               | 2.1                | This Work |
| WO <sub>3</sub> /V <sub>2</sub> O <sub>5</sub> | 57.0 (776 nm)                | 4.8               | 4.4                | [1]       |
| CdSe QDs-WO <sub>3</sub>                       | 54.5 (700 nm)                | 13.3              | 11.5               | [2]       |
| Gd-doped WO <sub>3</sub>                       | ~60 (633 nm)                 | 10.4              | 7.8                | [3]       |
| WO <sub>3</sub> 0.33H <sub>2</sub> O/PEDOT     | 50.9 (633 nm)                | 5                 | 25                 | [4]       |
| WO <sub>3</sub> /MoO <sub>x</sub>              | 55.4 (650 nm)                | 3.6               | 7.4                | [5]       |
| WO <sub>3</sub> -Sm                            | 73.8 (633 nm)                | 9.6               | 3.8                | [6]       |
| WO <sub>x</sub> nanorods                       | 57.0 (600 nm)                | 11.8              | 20.1               | [7]       |

## 1. Materials section

The main reagents used in this experiment include lithium perchlorate (LiClO<sub>4</sub>, analytically pure, Tianjin Jiangtian Unified Technology Co., Ltd.), potassium oxalate (K<sub>2</sub>C<sub>2</sub>O<sub>4</sub>·H<sub>2</sub>O, analytically pure, Tianjin Kewei Co., Ltd.), sodium tungstate dihydrate (Na<sub>2</sub>WO<sub>4</sub>·2H<sub>2</sub>O, analytically pure, Shanghai Macklin Biochemical Technology Co., Ltd.), polycarbonate (PC, analytically pure, Shanghai Macklin Biochemical Technology Co., Ltd.), nickel chloride hexahydrate (NiCl<sub>2</sub>·6H<sub>2</sub>O, analytically pure, Shanghai Eon Chemical Technology Co., Ltd.), hydrochloric acid (HCl, analytically pure, Tianjin Damo Chemical Reagent Factory), and cerium acetate (analytically pure, Shanghai Macklin Biochemical Technology Co., Ltd.), acetic acid (analytically pure,

Shanghai Macklin Biochemical Technology Co., Ltd.). All reagents are analytical grade and do not require further purification.

## 2. Charge density calculation

The charge density calculation can be seen in Eq:

$$Q = S/(VA) \quad (2)$$

Where  $Q$  represents the charge density ( $C/cm^2$ ),  $S$  is the area enclosed by the cyclic voltammogram curve,  $V$  is the scan rate ( $V/s$ ), and  $A$  is the surface area of the working electrode ( $cm^2$ ).

## 3. Peak current value calculation

The peak current value ( $i_p$ ) can be calculated using the equation:

$$i_p = 2.69 \times 10^5 n^{3/2} A D^{1/2} C V^{1/2} \quad (3)$$

Where  $i_p$  represents the peak current value,  $n$  is the number of electrons involved in the electrochemical reaction (assumed to be 1),  $A$  is the electrode area of the film,  $D$  is the  $Li^+$  diffusion coefficient,  $C$  is the ion concentration of  $Li^+$ , and  $V$  is the scan rate.

## 4. Calculation of transmittance difference

The calculation formula is as follows:

$$\Delta T = (T_b - T_c) \quad (4)$$

Where  $T_b$  and  $T_c$  represent the transmittance of the sample under bleached and colored conditions, respectively, at a certain wavelength.

## 5. CE calculation

To further determine the coloring efficiency of the prepared samples, the following formula can be utilized:

$$CE = \Delta OD / Q_i \quad (5)$$

$$\Delta OD = \log (T_b / T_c) \quad (6)$$

Where  $CE$  represents the coloration efficiency ( $cm^2/C$ );  $\Delta OD$  indicates the maximum change in optical density;  $Q_i$  is the quantity of charge injected or extracted per unit area.  $T_b$  and  $T_c$  are the transmittances in the bleached and colored states, respectively.

## Reference:

- [1] Tang K, Zhang Y, Shi Y, et al. Preparation of  $V_2O_5$  dot-decorated  $WO_3$  nanorod arrays for high performance multi-color electrochromic devices. *Journal of Materials Chemistry C*, 2018, 6: 12206-12216.
- [2] Hasani A, Le Q V, Tekalgne M, et al. Tungsten trioxide doped with CdSe quantum dots for smart windows. *ACS applied materials & interfaces*, 2018, 10: 43785-43791.

- [3] Yin Y, Lan C, Hu S, et al. Effect of Gd-doping on electrochromic properties of sputter deposited  $\text{WO}_3$  films. *Journal of Alloys and Compounds*, 2018, 739: 623-631.
- [4] Yue Y, Li H, Li K, et al. High-performance complementary electrochromic device based on  $\text{WO}_3 \cdot 0.33\text{H}_2\text{O}$ /PEDOT and prussian blue electrodes. *Journal of Physics and Chemistry of Solids*, 2017, 110: 284-289.
- [5] Hsu S C, Chao S H, Wu N J, et al. Facile synthesis of hybrid  $\text{WO}_3/\text{MoO}_x$  electrochromic films for application in complementary electrochromic devices. *Journal of Alloys and Compounds*, 2023, 945: 169256.
- [6] Luo G, Shen L, Zheng J, et al. A europium ion doped  $\text{WO}_3$  film with the bi-functionality of enhanced electrochromic switching and tunable red emission. *Journal of Materials Chemistry C*, 2017, 5: 3488-3494.
- [7] Chang X, Sun S, Dong L, et al. Tungsten oxide nanowires grown on graphene oxide sheets as high-performance electrochromic material. *Electrochimica Acta*, 2014, 129: 40-46.
